# Supplementary material
Source: HighWire-hosted journal article supplement (https://erj.ersjournals.com/content/55/5/2000599)
Supplement: inline-supplementary-material-1 [file inline-supplementary-material-1.pdf]

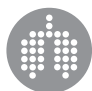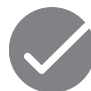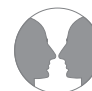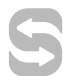

SHAREABLE PDF

# The influence of preventive strategies on the COVID-2019 epidemic in Shenzhen, China

Kai Yang<sup>1,2,3</sup>, Lingwei Wang<sup>1,2,3</sup>, Furong Li<sup>1,2</sup>, Dandan Chen<sup>1,2</sup>, Xi Li<sup>1,2</sup>,  
Chen Qiu<sup>1,2,4</sup> and Rongchang Chen<sup>1,2,4</sup>

**Affiliations:** <sup>1</sup>Dept of Respiratory and Critical Care Medicine, Shenzhen Key Laboratory of Respiratory Diseases, Shenzhen Institute of Respiratory Diseases, Second Clinical Medical College of Jinan University (Shenzhen people's Hospital), Shenzhen, China. <sup>2</sup>Dept of Respiratory and Critical Care Medicine, First Affiliated Hospital of South University of Science and Technology, Shenzhen, China. <sup>3</sup>Equal contribution. <sup>4</sup>Equal contribution as senior author.

**Correspondence:** Rongchang Chen, Dept of Respiratory and Critical Care Medicine, Second Clinical Medical College of Jinan University (Shenzhen people's Hospital), 1017 Dongmen North Rd, Shenzhen 518000, China. E-mail: chenrc@vip.163.com

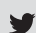

@ERSpublications

Early identification of imported cases, prevention of family clustering transmission, preventive measures in public areas and strict infection control procedures in hospitals were crucial for successful prevention of COVID-19 in Shenzhen, China <https://bit.ly/2UDb5JA>

**Cite this article as:** Yang K, Wang L, Li F, *et al.* The influence of preventive strategies on the COVID-2019 epidemic in Shenzhen, China. *Eur Respir J* 2020; 55: 2000599 [<https://doi.org/10.1183/13993003.00599-2020>].

This single-page version can be shared freely online.

## To the Editor:

Coronavirus disease 2019 (COVID-19) patients were first reported in Wuhan, in the Hubei province of China, in December 2019; the disease then spread to all provinces of China and >90 countries over the next 2 months [1–5]. By 7 March 2020, COVID-19 had infected >90 000 people and led to >3000 deaths [6]. There are ~20 million people living in Shenzhen, China, of which the external population from the internal area of China, including Hubei province, account for a large proportion. The high population density, the significant proportion of the external population and the high levels of mobility may have increased the possibility of the COVID-19 outbreak [7, 8]. The first COVID-19 patient in Shenzhen was admitted on 9 January 2020, and 419 cases were confirmed by 7 March 2020, ranking Shenzhen the top city outside Wuhan. Most of these patients were imported cases from the Hubei province, and there was no large-scale transmission or nosocomial infection in Shenzhen, until now.
